# Supplementary material for: Metabolic Phenotypes in Pancreatic Cancer
Source: PubMed Central journal article supplement (PMC4342019; doi:10.1371/journal.pone.0115153), 2015-02-26
Supplement: pone.0115153.s001.pdf [file pone.0115153.s001.pdf]

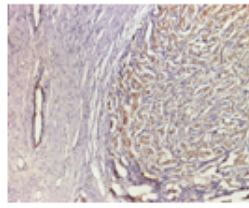

GLUT1  
Esophageal carcinoma

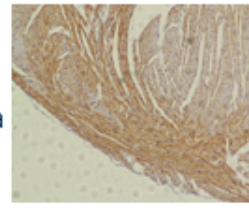

GLUT1  
Heart tissue

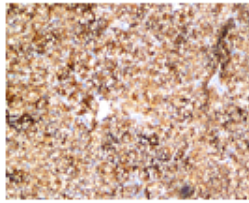

CAIX  
Renal carcinoma

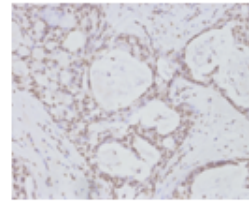

Beclin1  
Breast tissue

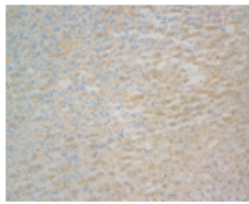

BNIP3  
Kidney tissue

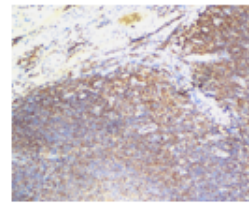

GOT1  
Kidney tissue

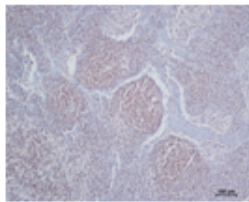

P62  
Spleen tissue

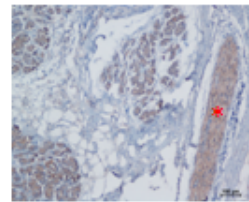

LC3  
Nerve tissue(\*) in  
pancreatic cancer

Figure A

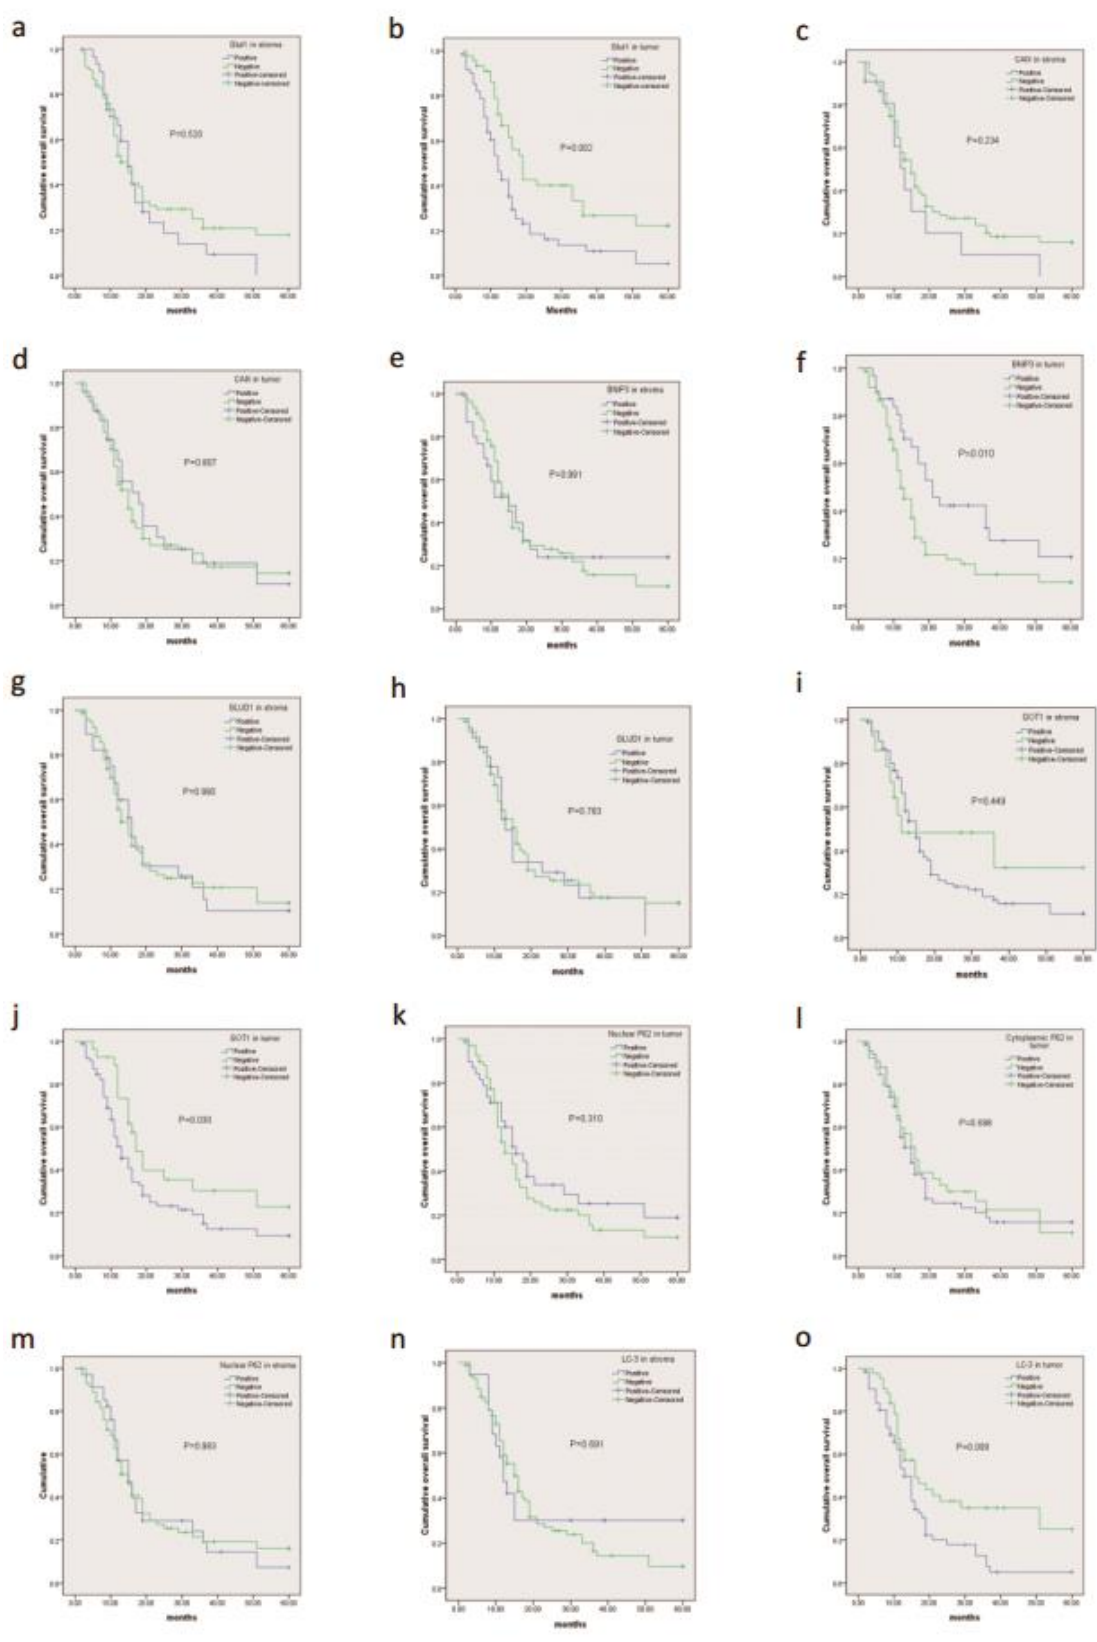

Figure B

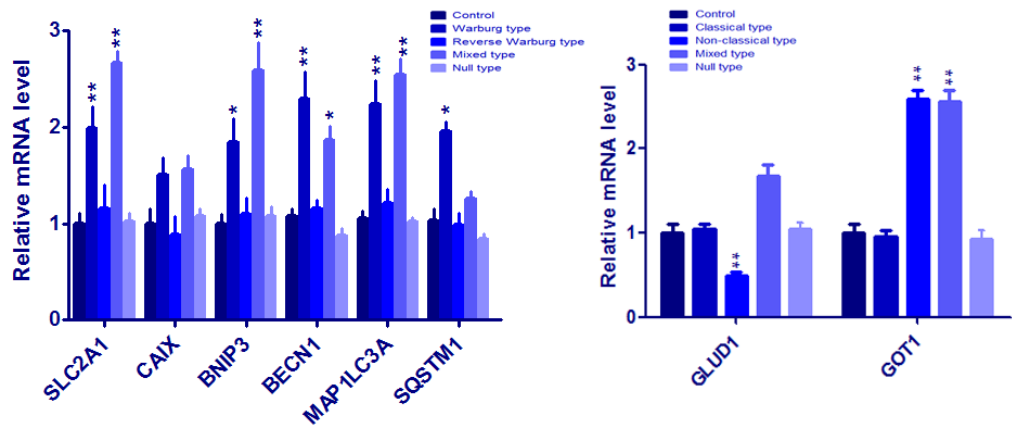

Figure C
