# Supplementary material for: Metabolic Phenotypes in Pancreatic Cancer
Source: PubMed Central journal article supplement (PMC4342019; doi:10.1371/journal.pone.0115153), 2015-02-26
Supplement: pone.0115153.s002.pdf [file pone.0115153.s002.pdf]

Table 1. Source, clone and dilution of antibodies used in this study

| Antibody                    | Clone      | Dilution | Company                    |
|-----------------------------|------------|----------|----------------------------|
| Glycolysis-related          |            |          |                            |
| GLUT1                       | Monoclonal | 1:250    | Epitomics, California, USA |
| CAIX                        | Monoclonal | 1:100    | Epitomics, California, USA |
| Mitochondrial satus-related |            |          |                            |
| BNIP3                       | Monoclonal | 1:50     | Epitomics, California, USA |
| Glutamine metabolism        |            |          |                            |
| GLUD1                       | Monoclonal | 1:100    | Epitomics, California, USA |
| GOT1                        | Monoclonal | 1:100    | Abgent, San Diego, USA     |
| Autophagy-related           |            |          |                            |
| Beclin-1                    | Monoclonal | 1:150    | Epitomics, California, USA |
| LC3                         | RB7481     | 1:100    | Abgent, San Diego, USA     |
| P62                         | Monoclonal | 1:100    | Abcam, Cambridge, UK       |

Table 2. Classification of tumor metabolic phenotypes according to the expression of metabolism-related proteins.

|                                                         | Glucose-derived metabolism                                          |                     |                        |                                                                     | Glutamine-derived metabolism      |                                 |
|---------------------------------------------------------|---------------------------------------------------------------------|---------------------|------------------------|---------------------------------------------------------------------|-----------------------------------|---------------------------------|
|                                                         | Warburg effect                                                      |                     | Reverse Warburg effect |                                                                     | Classical                         | Non-classical                   |
| Location                                                | Tumor                                                               | Stroma              | Tumor                  | Stroma                                                              | Tumor                             | Tumor                           |
| Metabolism                                              | Glycolysis                                                          | OXPHOS              | OXPHOS                 | Glycolysis                                                          | GLUD1 dependant<br>Glutaminolysis | GOT dependant<br>Glutaminolysis |
| Expressions<br>of<br>Metabolism<br>-related<br>proteins | GLUT1+ and<br>CAIX+;<br>GLUT1- and<br>CAIX+;<br>GLUT1+ and<br>CAIX- | GLUT1- and<br>CAIX- | GLUT1-<br>and CAIX-    | GLUT1+ and<br>CAIX+;<br>GLUT1- and<br>CAIX+;<br>GLUT1+ and<br>CAIX- | GLUD1+ and GOT1-                  | GLUD1- and GOT1+                |

Table 3. Pairwise comparisons of Kaplan-Meier survival curves for patients after surgery for pancreatic ductal adenocarcinoma demonstrating relationships of the glucose-dependent metabolism phenotypes with postoperative overall survival.

| Glucose-derived<br>metabolism | Warburg type |       | Reverse Warburg type |       | Mixed type |       | Null type |       |
|-------------------------------|--------------|-------|----------------------|-------|------------|-------|-----------|-------|
|                               | $\chi^2$     | Sig.  | $\chi^2$             | Sig.  | $\chi^2$   | Sig.  | $\chi^2$  | Sig.  |
| Warburg type                  |              |       | 4.513                | 0.034 | 0.481      | 0.488 | 3.907     | 0.048 |
| Reverse Warburg<br>type       | 4.513        | 0.034 |                      |       | 7.433      | 0.006 | 0.208     | 0.648 |
| Mixed type                    | 0.481        | 0.488 | 7.433                | 0.006 |            |       | 4.450     | 0.035 |
| Null type                     | 3.907        | 0.048 | 0.208                | 0.648 | 4.450      | 0.035 |           |       |

Table 4. Pairwise comparisons of Kaplan-Meier survival curves for patients after surgery for pancreatic ductal adenocarcinoma demonstrating relationships of the glutamine-derived metabolism phenotypes with postoperative overall survival.

| Glutamine-derived metabolism | Classical type |       | Non-classical type |       | Mixed type |       | Null type |       |
|------------------------------|----------------|-------|--------------------|-------|------------|-------|-----------|-------|
|                              | $\chi^2$       | Sig.  | $\chi^2$           | Sig.  | $\chi^2$   | Sig.  | $\chi^2$  | Sig.  |
| Classical type               |                |       | 6.737              | 0.009 | 21.704     | 0.000 | 0.563     | 0.453 |
| Non-classical type           | 6.737          | 0.009 |                    |       | 16.803     | 0.000 | 4.814     | 0.028 |
| Mixed type                   | 21.704         | 0.000 | 16.803             | 0.000 |            |       | 15.425    | 0.000 |
| Null type                    | 0.563          | 0.453 | 4.814              | 0.028 | 15.425     | 0.000 |           |       |

Table 5. Pairwise comparisons of Kaplan-Meier survival curves for patients after surgery for pancreatic ductal adenocarcinoma demonstrating relationships of the two subtypes of metabolisms with postoperative overall survival.

| Metabolism types         | Glutamine-dependent type |       | Glucose-dependent type |       | Mixed type |       | Null type |       |
|--------------------------|--------------------------|-------|------------------------|-------|------------|-------|-----------|-------|
|                          | $\chi^2$                 | Sig.  | $\chi^2$               | Sig.  | $\chi^2$   | Sig.  | $\chi^2$  | Sig.  |
| Glutamine-dependent type |                          |       | 1.172                  | 0.279 | 0.369      | 0.544 | 4.402     | 0.036 |
| Glucose-dependent type   | 1.172                    | 0.279 |                        |       | 1.160      | 0.281 | 5.246     | 0.022 |
| Mixed type               | 0.369                    | 0.544 |                        |       |            |       | 0.512     | 0.474 |
| Null type                | 4.402                    | 0.036 | 5.246                  | 0.022 | 0.512      | 0.474 |           |       |

Table 6. Pairwise comparisons of Kaplan-Meier survival curves for patients after surgery for pancreatic ductal adenocarcinoma demonstrating relationships of the metabolism phenotypes with postoperative overall survival.

| Combination<br>of metabolism<br>subtypes | Zero type |       | One type |       | Two type |       | Three type |       | Four type |       |
|------------------------------------------|-----------|-------|----------|-------|----------|-------|------------|-------|-----------|-------|
|                                          | $\chi^2$  | Sig.  | $\chi^2$ | Sig.  | $\chi^2$ | Sig.  | $\chi^2$   | Sig.  | $\chi^2$  | Sig.  |
| Zero type                                |           |       | 2.396    | 0.122 | 4.380    | 0.036 | 5.756      | 0.016 | 3.000     | 0.083 |
| One type                                 | 2.396     | 0.122 |          |       | 0.742    | 0.039 | 5.886      | 0.005 | 15.000    | 0.000 |
| Two type                                 | 4.380     | 0.036 | 0.742    | 0.039 |          |       | 5.089      | 0.024 | 11.764    | 0.001 |
| Three type                               | 5.756     | 0.016 | 5.886    | 0.005 | 5.089    | 0.024 |            |       | 8.5000    | 0.004 |
| Four type                                | 3.000     | 0.083 | 15.000   | 0.000 | 11.764   | 0.001 | 8.5000     | 0.004 |           |       |

Table 7. The primers of metabolism related genes.

| Accession No. | Gene     | Primer sequence (5'to3') | Products (bp)            | Tm (°C) |      |
|---------------|----------|--------------------------|--------------------------|---------|------|
| AK292791      | GLUT1    | Forwards                 | GCGGTTTTCTATTACTCCACAAGC | 122     | 62.0 |
|               |          | Reverse                  | TCCACCACGAACAGCGACAC     |         |      |
| AI023541      | CAIX     | Forwards                 | GACCTTGTTGGAATGGCTCTT    | 160     | 60.2 |
|               |          | Reverse                  | TGGATTCAGGTGCAAATGCAA    |         |      |
| AF002697      | BNIP3    | Forwards                 | TTGGATGCACAACATGAATCAGG  | 140     | 61.0 |
|               |          | Reverse                  | TCTTCTGACTGAGAGCTATGGTC  |         |      |
| AF077301      | BECN1    | Forwards                 | GGTGTCTCTCGCAGATTCATC    | 121     | 61.4 |
|               |          | Reverse                  | TCAGTCTTCGGCTGAGGTTCT    |         |      |
| AF276658      | MAP1LC3A | Forwards                 | AACATGAGCGAGTTGGTCAAG    | 127     | 58   |
|               |          | Reverse                  | GCTCGTAGATGTCCGCGAT      |         |      |
| AK098077      | SQSTM1   | Forwards                 | GACTACGACTTGTGTAGCGTC    | 139     | 61.1 |
|               |          | Reverse                  | AGTGTCCTGTTTACCTTCC      |         |      |
| AK094782      | GLUD1    | Forwards                 | CTGTGGTCGATGTACCGTTTG    | 109     | 61.5 |
|               |          | Reverse                  | AGCTCCATAGTGAACCTCCGT    |         |      |
| AF052153      | GOT1     | Forwards                 | CCACCCTTTCAGTGTTTCATGG   | 131     | 61.2 |
|               |          | Reverse                  | GCCTTCATTTGTCATGCAGACT   |         |      |
